CORRECTION

# Correction: Proteogenomic Characterization of Monocyclic Aromatic Hydrocarbon Degradation Pathways in the Aniline-degrading Bacterium *Burkholderia* sp. K24

Sang-Yeop Lee, Gun-Hwa Kim, Sung Ho Yun, Chi-Won Choi, Yoon-Sun Yi, Jonghyun Kim, Young-Ho Chung, Edmond Changkyun Park, Seung Il Kim

The following information is missing from the Funding section: This study was supported by the Korea Basic Science Institute research program (D35402), the Bio-Synergy Research Project (NRF- 2014M3A9C4066461) of the Ministry of Science, ICT and Future Planning through the National Research Foundation, Basic Science Research Program through the National Research Foundation of Korea funded by the Ministry of Education of Korea (2014R1A6A3A01059331).

## Reference

1. Lee S-Y, Kim G-H, Yun SH, Choi C-W, Yi Y-S, Kim J, et al. (2016) Proteogenomic Characterization of Monocyclic Aromatic Hydrocarbon Degradation Pathways in the Aniline-Degrading Bacterium *Burkholderia* sp. K24. PLoS ONE 11(4): e0154233. doi:[10.1371/journal.pone.0154233](https://doi.org/10.1371/journal.pone.0154233) PMID: [27124467](https://pubmed.ncbi.nlm.nih.gov/27124467/)

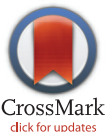

## OPEN ACCESS

**Citation:** Lee S-Y, Kim G-H, Yun SH, Choi C-W, Yi Y-S, Kim J, et al. (2016) Correction: Proteogenomic Characterization of Monocyclic Aromatic Hydrocarbon Degradation Pathways in the Aniline-degrading Bacterium *Burkholderia* sp. K24. PLoS ONE 11(6): e0157201. doi:[10.1371/journal.pone.0157201](https://doi.org/10.1371/journal.pone.0157201)

**Published:** June 3, 2016

**Copyright:** © 2016 Lee et al. This is an open access article distributed under the terms of the [Creative Commons Attribution License](https://creativecommons.org/licenses/by/4.0/), which permits unrestricted use, distribution, and reproduction in any medium, provided the original author and source are credited.
